# Supplementary material
Source: publisher figshare collection journal article supplement (https://acs.figshare.com/ndownloader/files/22252326)
Supplement: Supplementary file 1 [file 22252326]

# Facile Preparation of Polyimine Vitrimers with Enhanced Creep Resistance, Thermal and Mechanical Properties via Metal Coordination

Sheng Wang,<sup>a,b</sup> Songqi Ma,<sup>a\*</sup> Qiong Li,<sup>a,b</sup> Xiwei Xu,<sup>a</sup> Binbo Wang,<sup>a</sup> Kaifeng Huang,<sup>a</sup> Yanlin  
liu,<sup>a</sup> Jin Zhu<sup>a</sup>

<sup>a</sup> Key laboratory of bio-based polymeric materials technology and application of Zhejiang  
province, Ningbo Institute of Materials Technology and Engineering, Chinese Academy of  
Sciences, Ningbo 315201, P. R. China

<sup>b</sup> University of Chinese Academy of Sciences, Beijing 100049, P. R. China

\*Corresponding authors: (Songqi Ma) E-mail [masongqi@nimte.ac.cn](mailto:masongqi@nimte.ac.cn), Tel 86-574-87619806

## Content

|                                                                                                                                                                                         |   |
|-----------------------------------------------------------------------------------------------------------------------------------------------------------------------------------------|---|
| Figure S1. Non isothermal DSC curves of the polyimine-metal complex vitrimers with CuCl <sub>2</sub> • 2H <sub>2</sub> O or CuCl <sub>2</sub> as the metal salts.....                   | 2 |
| Figure S2. (a) Structure of model compound lig A; (b) The two possible structural conformers of lig A. The relative energies (in kcal mol <sup>-1</sup> ) are shown in parenthesis..... | 2 |
| Figure S3. Digital photos of the polyimine-metal complex vitrimers.....                                                                                                                 | 3 |
| Figure S4. TEM images of P-Cu5, P-Mg5 and P-Fe5.....                                                                                                                                    | 3 |
| Figure S5. Temperature-dependent FTIR spectra of (d) P-Cu5, (e) P-Mg5 and (f) P-Fe5.....                                                                                                | 4 |
| Figure S6. <sup>1</sup> H NMR spectra of the extracts from the vitrimers during swelling test in DMSO at 140 ° C.....                                                                   | 5 |
| Figure S7. Stress relaxation curves of P-Cu5, P-Fe5 and P-Mg5 at 190 ° C. 6                                                                                                             | 6 |
| Figure S8. DMA curves of P-Cu5 before and after two cycles reprocessing. .                                                                                                              | 6 |
| Figure S9. Stability of P-0 and P-Cu5 in different solvents at room temperature (R.T.) for 72 h.....                                                                                    | 7 |
| Figure S10. Contact angle of P-0 and P-Cu5 in water.....                                                                                                                                | 8 |
| Figure S11. UV-Vis absorption spectrum of P-Cu5 extracts in water.....                                                                                                                  | 8 |
| Figure S12. <sup>1</sup> H NMR spectrum of P-Cu5 extracts during stability test in DMSO. ....                                                                                           | 9 |
| Table S1. TGA Data of the polyimine vitrimers.....                                                                                                                                      | 9 |

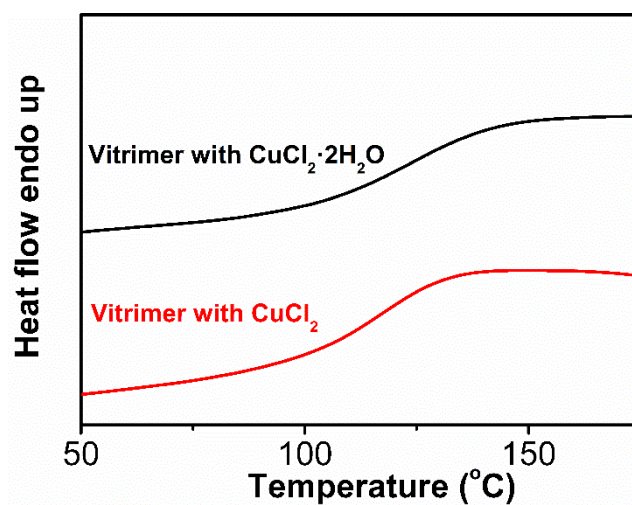

**Figure S1.** Non isothermal DSC curves of the polyimine-metal complex vitrimers with CuCl<sub>2</sub>·2H<sub>2</sub>O or CuCl<sub>2</sub> as the metal salts.

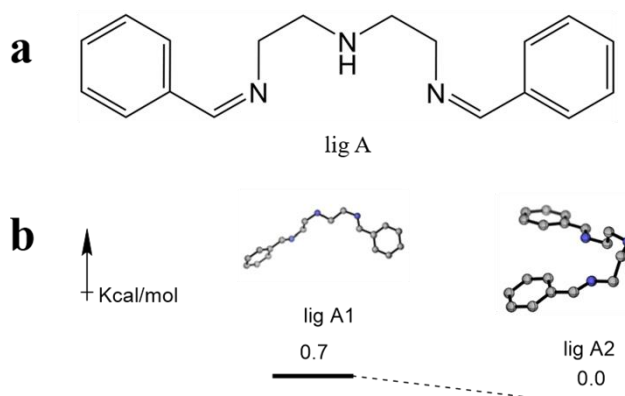

**Figure S2.** (a) Structure of model compound lig A; (b) The two possible structural conformers of lig A. The relative energies (in kcal mol<sup>-1</sup>) are shown in parenthesis.

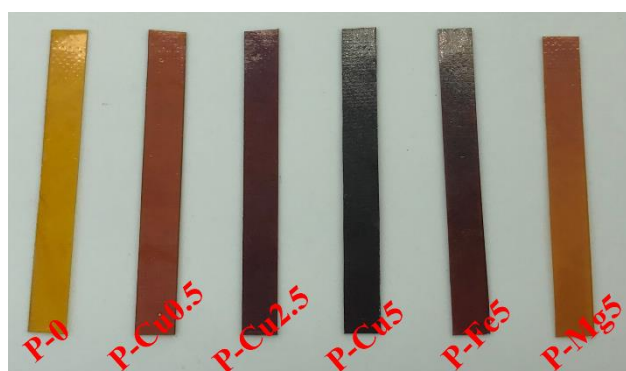

**Figure S3.** Digital photos of the polyimine-metal complex vitrimers.

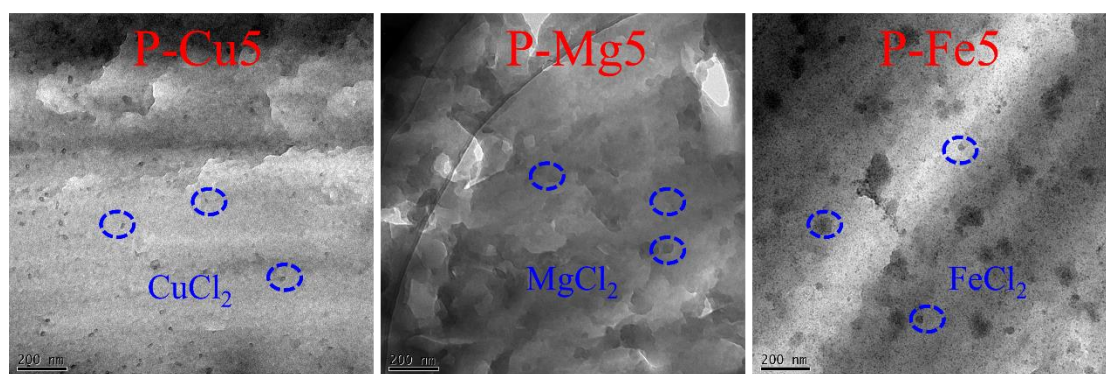

**Figure S4.** TEM images of P-Cu5, P-Mg5 and P-Fe5.

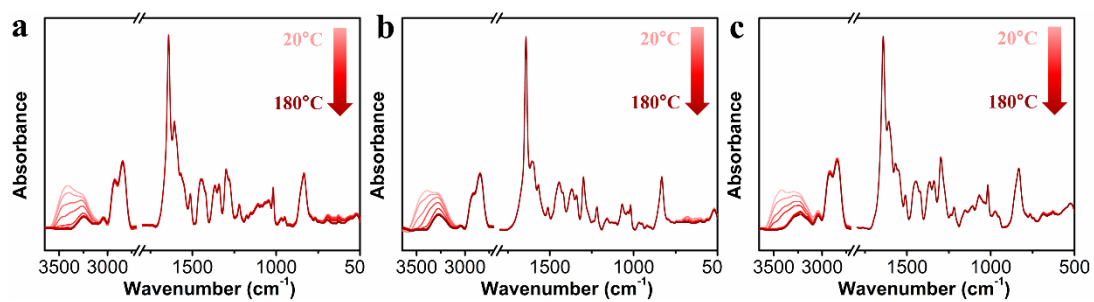

**Figure S5.** Temperature-dependent FTIR spectra of (d) P-Cu5, (e) P-Mg5 and (f) P-Fe5.

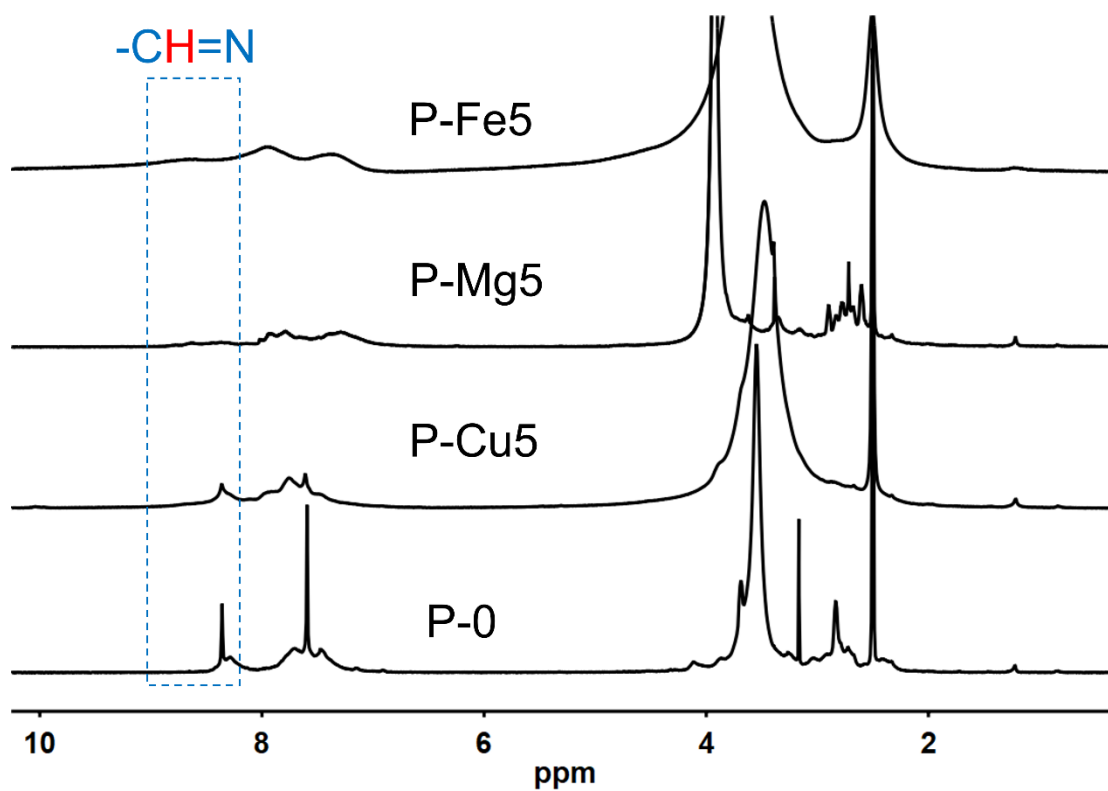

**Figure S6.**  $^1\text{H}$  NMR spectra of the extracts from the vitrimers during swelling test in DMSO at 140 °C.

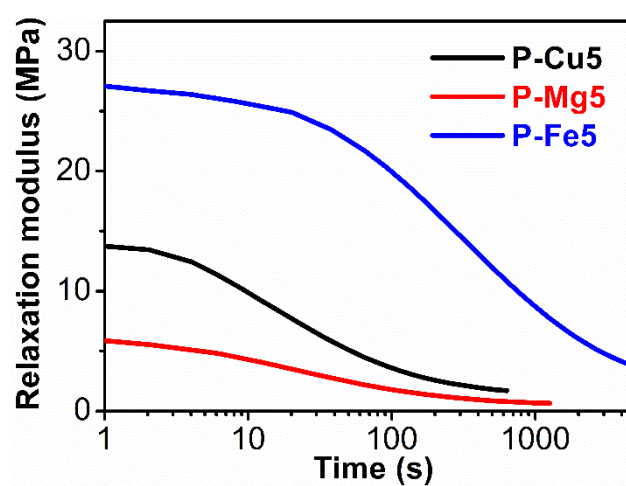

**Figure S7.** Stress relaxation curves of P-Cu5, P-Fe5 and P-Mg5 at 190 °C.

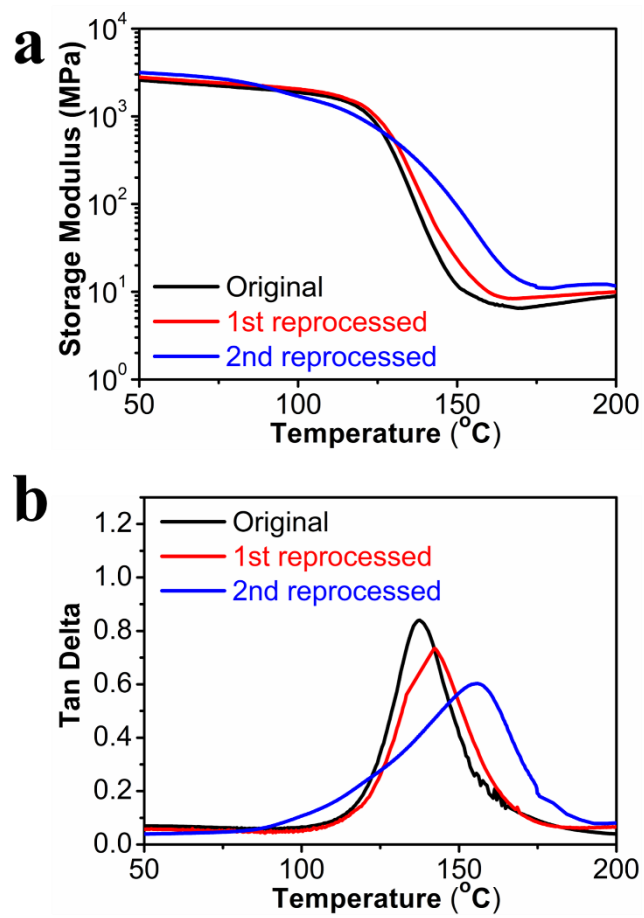

**Figure S8.** DMA curves of P-Cu5 before and after two cycles reprocessing.

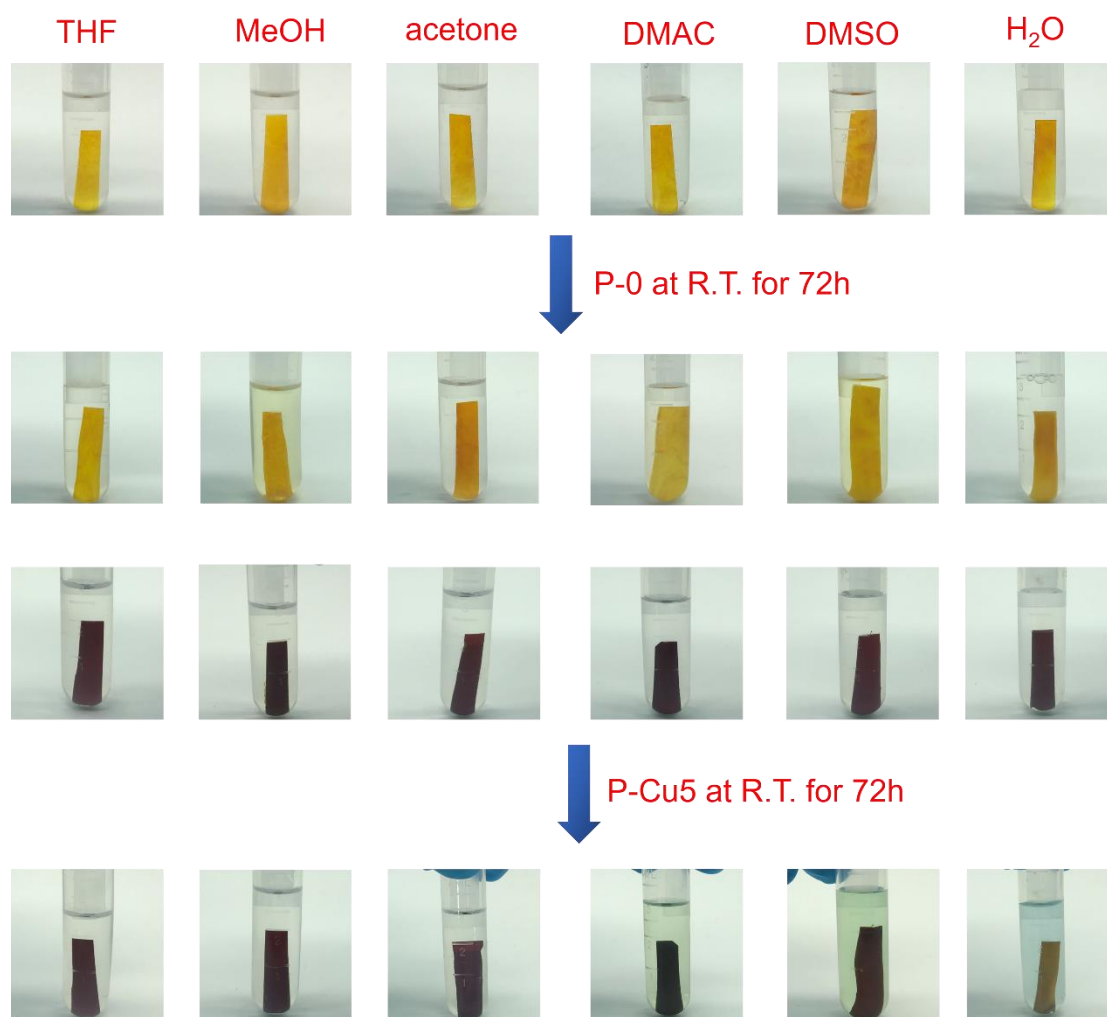

**Figure S9.** Stability of P-0 and P-Cu5 in different solvents at room temperature (R.T.) for 72 h.

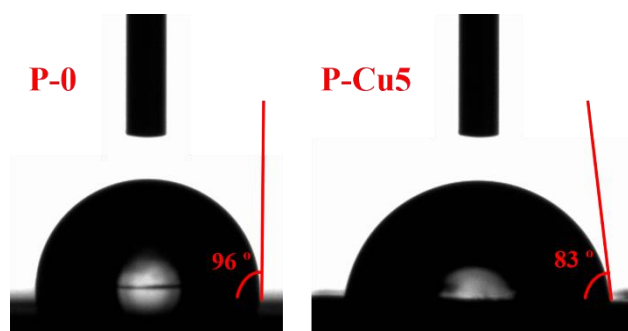

**Figure S10.** Contact angle of P-0 and P-Cu5 in water.

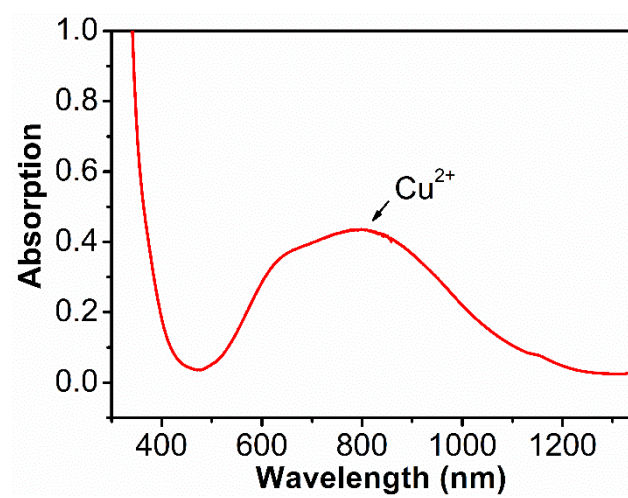

**Figure S11.** UV-Vis absorption spectrum of P-Cu5 extracts in water.



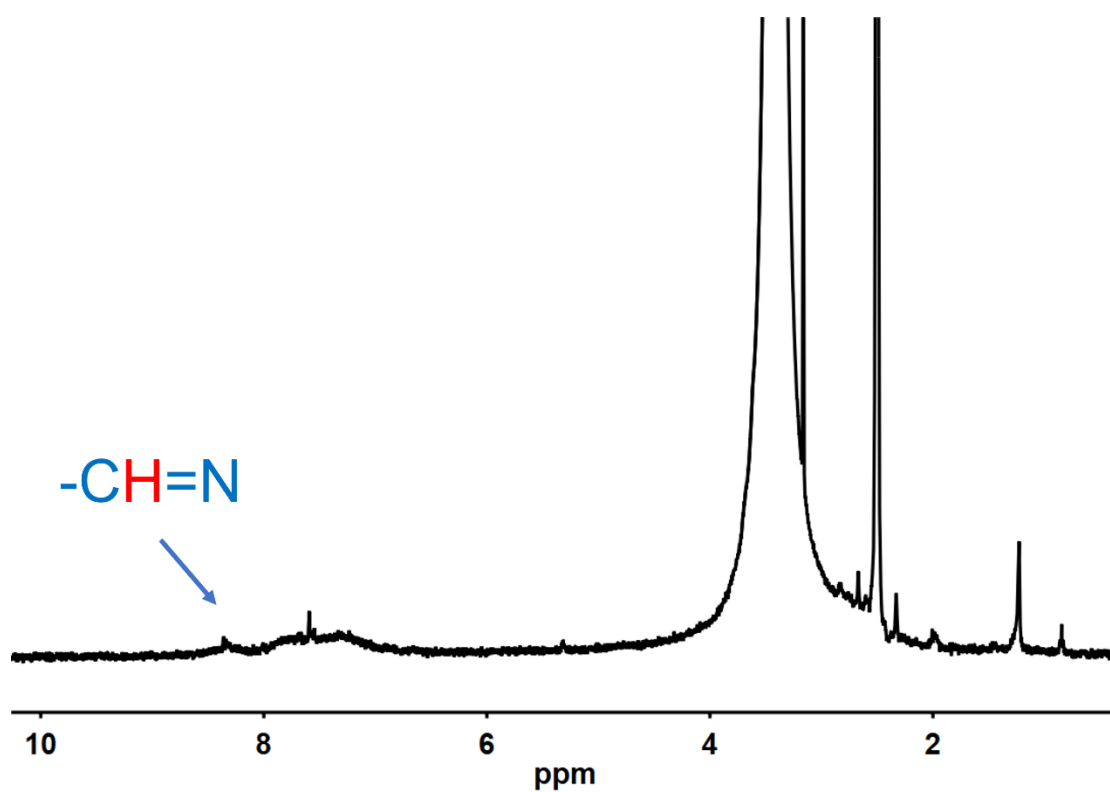

**Figure S12.**  $^1\text{H}$  NMR spectrum of P-Cu5 extracts during stability test in DMSO.

**Table S1.** TGA Data of the polyimine vitrimers.

| Sample  | $T_{d5\%}(\text{°C})$ | $T_{d30\%}(\text{°C})$ | $R_{700}(\%)$ |
|---------|-----------------------|------------------------|---------------|
| P-0     | 278                   | 422                    | 39.4          |
| P-Cu0.5 | 278                   | 416                    | 39.8          |
| P-Cu2.5 | 281                   | 400                    | 42.4          |
| P-Cu5   | 282                   | 412                    | 44.2          |
| P-Mg5   | 281                   | 395                    | 40.2          |
| P-Fe5   | 289                   | 401                    | 45.4          |
